# Supplementary material
Source: publisher site journal article supplement (https://www.dovepress.com/get_supplementary_file.php?f=424086.xlsx)
Supplement: Supplementary file 1 [file get_supplementary_file.php]

## Sheet: Table S1
Table S1. STROBE-MR checklist of recommended items to address in reports of Mendelian randomisation studies
Item No.	Section	Checklist item	Section (paragraph number)
1	TITLE and ABSTRACT	Indicate Mendelian randomisation as the study’s design in the title and/or the abstract if that is a main purpose of the study	Title page & Abstract page
	INTRODUCTION
2	Background	Explain the scientific background and rationale for the reported study. What is the exposure? Is a potential causal relationship between exposure and outcome plausible? Justify why MR is a helpful method to address the study question	Introduction
3	Objectives	State specific objectives clearly, including pre-specified causal hypotheses (if any). State that MR is a method that, under specific assumptions, intends to estimate causal effects	Introduction (paragraph 5) & Figure 1
	METHODS
4	Study design and data sources	Present key elements of the study design early in the article. Consider including a table listing sources of data for all phases of the study. For each data source contributing to the analysis, describe the following:	Methods
	a)	Setting: Describe the study design and the underlying population, if possible. Describe the setting, locations, and relevant dates, including periods of recruitment, exposure, follow-up, and data collection, when available.	Methods
	b)	Participants: Give the eligibility criteria, and the sources and methods of selection of participants. Report the sample size, and whether any power or sample size calculations were carried out prior to the main analysis	Methods
	c)	Describe measurement, quality control and selection of genetic variants	Methods
	d)	For each exposure, outcome, and other relevant variables, describe methods of assessment and diagnostic criteria for diseases	Methods
	e)	Provide details of ethics committee approval and participant informed consent, if relevant	NA
5	Assumptions	Explicitly state the three core IV assumptions for the main analysis (relevance, independence and exclusion restriction) as well assumptions for any additional or sensitivity analysis	Methods
6	Statistical methods: main analysis	Describe statistical methods and statistics used
	a)	Describe how quantitative variables were handled in the analyses (i.e., scale, units, model)	Methods
	b)	Describe how genetic variants were handled in the analyses and, if applicable, how their weights were selected	Methods
	c)	Describe the MR estimator (e.g. two-stage least squares, Wald ratio) and related statistics. Detail the included covariates and, in case of two-sample MR, whether the same covariate set was used for adjustment in the two samples	Methods
	d)	Explain how missing data were addressed	N/A
	e)	If applicable, indicate how multiple testing was addressed	Methods
7	Assessment of assumptions	Describe any methods or prior knowledge used to assess the assumptions or justify their validity	Methods
8	Sensitivity analyses and additional analyses	Describe any sensitivity analyses or additional analyses performed (e.g. comparison of effect estimates from different approaches, independent replication, bias analytic techniques, validation of instruments, simulations)	Methods
9	Software and pre-registration
	a)	Name statistical software and package(s), including version and settings used	Methods
	b)	State whether the study protocol and details were pre-registered (as well as when and where)	N/A
	RESULTS
10	Descriptive data
	a)	Report the numbers of individuals at each stage of included studies and reasons for exclusion. Consider use of a flow-diagram	Methods & Table S2
	b)	Report summary statistics for phenotypic exposure(s), outcome(s) and other relevant variables (e.g. means, SDs, proportions)	Table S2
	c)	If the data sources include meta-analyses of previous studies, provide the assessments of heterogeneity across these studies	N/A
	d)	For two-sample Mendelian randomisation:	N/A
		i. Provide justification of the similarity of the genetic variant-exposure associations between the exposure and outcome samples
		ii. Provide information on the number of individuals who were in both samples for the exposure and for the outcome
11	Main results
	a)	Report the associations between genetic variant and exposure, and between genetic variant and outcome, preferably on an interpretable scale	Results
	b)	Report MR estimates of the relationship between exposure and outcome, and the measures of uncertainty from the MR analysis, on an interpretable scale, such as odds ratio or relative risk per SD difference	Results
	c)	If relevant, consider translating estimates of relative risk into absolute risk for a meaningful time period	N/A
	d)	Consider plots to visualize results (e.g. forest plot, scatterplot of associations between genetic variants and outcome versus between genetic variants and exposure)	Figures 2-5
12	Assessment of assumptions
	a)	Report the assessment of the validity of the assumptions	Results
	b)	Report any additional statistics (e.g., assessments of heterogeneity across genetic variants, such as I2, Q statistic or E-value)	Table S11
13	Sensitivity analyses and additional analyses
	a)	Report any sensitivity analyses to assess the robustness of the main results to violations of the assumptions	We used different sets of instrument variables to test the robustness and used different meta-analysis method to pool the estimate.
	b)	Report results from other sensitivity analyses or additional analyses
	c)	Report any assessment of direction of causal relationship (e.g., bidirectional MR)	N/A
	d)	When relevant, report and compare with estimates from non-MR analyses	N/A
	e)	Consider additional plots to visualize results (e.g., leave-one-out analyses)	Table S12-13
	DISCUSSION
14	Key results	Summarize key results with reference to study objectives	Discussion
15	Limitations	Discuss limitations of the study, taking into account the validity of the IV assumptions, other sources of potential bias, and imprecision. Discuss both direction and magnitude of any potential bias and any efforts to address them	Discussion
16	Interpretation
	a)	Meaning: Give a cautious overall interpretation of results in the context of their limitations and in comparison with other studies	Discussion
	b)	Mechanism: Discuss underlying biological mechanisms that could drive a potential causal relationship between the investigated exposure and the outcome, and whether the gene-environment equivalence assumption is reasonable. Use causal language carefully, clarifying that IV estimates may provide causal effects only under certain assumptions	Discussion
	c)	Clinical relevance: Discuss whether the results have clinical or public policy relevance, and to what extent they inform effect sizes of possible interventions	Discussion
17	Generalizability	Discuss the generalizability of the study results (a) to other populations, (b) across other exposure periods/timings, and (c) across other levels of exposure	Discussion
	OTHER INFORMATION
18	Funding	Describe sources of funding and the role of funders in the present study and, if applicable, sources of funding for the databases and original study or studies on which the present study is based	Funding section
19	Data and data sharing	Provide the data used to perform all analyses or report where and how the data can be accessed, and reference these sources in the article. Provide the statistical code needed to reproduce the results in the article,or report whether the code is publicly accessible and if so, where	Data share statement & Table S2
20	Conflicts of Interest	All authors should declare all potential conflicts of interest	Competing interests section

## Sheet: Table S2
Table S2. Phenotype descriptions and distributions
Phenotypes	Study / Consortium	First Author (Year)	PMID	Sample Size	N Cases	N Controls	Population	GWAS ID (MRC-IEU)	Unit
C reactive protein	CHARGE(Cohorts for Heart and Aging Research in Genomic Epidemiology)	Ligthart, S/2018	30388399	204402	Continous variable	Continous variable	European	ieu-b-35	Natural logarithm transmitted CRP level
sIL-6r	INTERVAL	Benjamin, S/2019	29875488	3301	Continous variable	Continous variable	European	-	SD change of sIL-6r
GP130	deCODE	Egil, F/2021	34857953	35559	Continous variable	Continous variable	European	-	SD change of gp130
Back pain for 3+ months	UKBiobank	Ben E/2018	-	117404	80588	36816	European	ukb-b-8463	-
Neck/shoulder pain for 3+ months	UKBiobank	Ben E/2018	-	105396	72887	32509	European	ukb-b-16118	-
Headache for 3+ month	UKBiobank	Ben E/2018	-	91269	41719	49550	European	ukb-b-13092	-
Hip pain for 3+ months	UKBiobank	Ben E/2018	-	51516	40152	11364	European	ukb-b-133	-
Knee pain for 3+ months	UKBiobank	Ben E/2018	-	97889	76910	20979	European	ukb-b-8906	-
Facial pain for 3+ months	UKBiobank	Neale lab/2018	-	6510	3107	3403	European	ukb-b-2067	-
Stomache/abdominal pain for 3+months	UKBiobank	Ben E/2018	-	38911	21711	17200	European	ukb-b-19097	-

## Sheet: Table S3
Table S3. Characteristics of main genetic instruments associated with C reactive protein in target IL-6R genes
	SNP	effect allele	other allele	beta (from CHARGE cohort)	se (from CHARGE cohort)	pvalue (from CHARGE cohort)
IL6R	rs112203594	A	C	0.0591	0.024	0.0138
	rs11264224	A	C	0.0465	0.0057	3.41e-16
	rs113580743	A	G	0.0708	0.0112	2.59e-10
	rs116141616	A	G	0.0614	0.0197	0.00183
	rs12059682	T	C	-0.0441	0.0049	2.26e-19
	rs12083537	A	G	0.0643	0.0053	7.14e-34
	rs12406117	A	G	0.0136	0.0043	0.00156
	rs12735458	A	G	0.126	0.0183	5.77e-12
	rs144029367	T	C	-0.0752	0.0185	4.81e-05
	rs145262901	A	G	-0.0844	0.0183	3.99e-06
	rs145909430	T	C	0.1396	0.0272	2.86e-07
	rs16836054	A	G	0.0453	0.0054	4.91e-17
	rs183641528	A	G	-0.1034	0.0178	6.29e-09
	rs2228145	A	C	0.0899	0.0042	1.21e-101
	rs34693607	C	G	0.0368	0.0057	1.07e-10
	rs3738028	A	C	0.0121	0.0047	0.01
	rs3766925	A	T	-0.0093	0.00489999	0.0577
	rs41269913	T	C	-0.0779	0.0147	1.16e-07
	rs56100876	A	G	-0.18	0.0262	6.41e-12
	rs61806853	T	C	0.0456	0.0112	4.67e-05
	rs6698385	A	G	-0.0216	0.0051	2.28e-05
	rs73026617	T	C	0.0474	0.0068	3.16e-12
	rs7525477	A	G	0.0382	0.0051	6.88e-14
	rs76289529	T	C	-0.0715	0.0171	2.9e-05
	rs77994623	T	C	0.0332	0.0061	5.25e-08
	rs78035035	A	C	0.052	0.0248	0.036

## Sheet: Table S4
Table S4. Characteristics of genetics variants associated with sIL-6R in target IL-6R genes
	SNP	effect allele	other allele	beta	se	pvalue
sIL-6R	rs10752605	A	G	-0.3349	0.0374	3.63e-19
	rs11264224	A	C	-0.4576	0.0336	3.89e-42
	rs113580743	A	G	-0.5141	0.0605	1.95e-17
	rs115697580	A	G	-0.4684	0.0967	1.26e-06
	rs115880387	A	G	-0.6209	0.1388	7.59e-06
	rs116568035	A	G	-0.3112	0.0696	7.76e-06
	rs116805289	A	C	0.6267	0.0822	2.51e-14
	rs138398618	A	G	-0.5044	0.1027	9.12e-07
	rs139952834	T	C	-0.6506	0.1072	1.29e-09
	rs142712385	A	T	-0.2782	0.0534	1.91e-07
	rs147700711	T	G	-0.4972	0.119	2.95e-05
	rs147745605	T	C	0.5012	0.1034	1.26e-06
	rs149551556	T	C	-0.6651	0.0947	2.19e-12
	rs181862028	A	T	-0.4133	0.1042	7.24e-05
	rs2297607	A	G	0.1756	0.0291	1.66e-09
	rs3103309	T	C	0.16	0.0261	8.51e-10
	rs35717427	A	G	0.5238	0.036	5.62e-48
	rs3766924	T	C	-0.3863	0.03	7.94e-38
	rs3766925	A	T	0.184	0.0294	3.89e-10
	rs41269913	T	C	0.6983	0.0599	1.95e-31
	rs4129267	T	C	1.1148	0.0157	1e-200
	rs4633282	T	C	0.6124	0.0286	6.31e-102
	rs56258967	T	C	0.4718	0.1151	4.17e-05
	rs61806853	T	C	-0.4957	0.0573	5.01e-18
	rs67860750	C	G	0.3985	0.0353	1.41e-29
	rs7525477	A	G	-0.3502	0.0261	4.79e-41
	rs76289529	T	C	0.6656	0.0678	9.77e-23
	rs76518735	A	C	0.5646	0.0924	1e-09
	rs77741705	C	G	0.5205	0.0941	3.16e-08
	rs77994623	T	C	-0.6184	0.0307	2.75e-90
	rs79219014	T	G	0.7582	0.0767	4.57e-23
	rs79438587	T	C	0.405	0.0338	4.07e-33
	rs79778789	A	G	-0.7852	0.0887	8.32e-19
	rs79925547	T	C	0.752	0.1155	7.41e-11

## Sheet: Table S5
Table S5. Characteristics of cisCRP genetics variants
	SNP	effect allele	other allele	beta	se	pvalue
CRP	rs11265194	T	G	-0.027251	0.00388	2.23975e-12
	rs12026296	C	T	-0.095193	0.008586	1.55991e-28
	rs12043437	C	T	-0.04123	0.005901	2.91005e-12
	rs12047264	A	G	-0.046115	0.00486	2.49977e-21
	rs12117074	A	G	0.104477	0.011968	2.71019e-18
	rs12564019	T	C	-0.048539	0.007494	9.68055e-11
	rs12746608	G	C	0.10483	0.011957	1.93999e-18
	rs16842568	G	A	0.224297	0.007356	1e-200
	rs17457976	G	A	0.086177	0.005703	1.53993e-51
	rs17459069	T	C	-0.212723	0.013677	1.66994e-54
	rs1800947	G	C	-0.283378	0.008855	1e-200
	rs1811472	C	G	-0.121135	0.003885	1e-200
	rs2121477	T	C	-0.064985	0.011899	4.84005e-08
	rs3093070	G	T	0.220217	0.019199	2.02023e-30
	rs4255379	A	G	0.063862	0.003823	1.3499e-62
	rs7521729	A	C	0.037477	0.006124	9.67008e-10

## Sheet: Table S6
Table S6. Characteristics of cisGP130 genetics variants
	SNP	effect allele	other allele	beta	se	pvalue
GP130	rs1063560	C	G	-0.1969	0.034216	8.684e-09
	rs111379648	A	G	-0.2353	0.029774	2.727e-15
	rs1144496	T	C	-0.0556	0.008479	5.486e-11
	rs116205593	C	T	-0.1314	0.019912	4.137e-11
	rs116753755	C	T	-0.1762	0.020373	5.203e-18
	rs158653	A	G	0.0464	0.008368	2.946e-08
	rs167624	G	C	-0.0476	0.008355	1.217e-08
	rs17701253	T	C	-0.0873	0.013574	1.263e-10
	rs254987	G	A	0.0557	0.008374	2.908e-11
	rs2897879	T	C	0.077	0.008437	7.047e-20
	rs3761771	G	T	-0.0686	0.011179	8.435e-10
	rs3846513	C	T	-0.2684	0.018271	7.475e-49
	rs421256	T	C	0.0776	0.008875	2.253e-18
	rs55889171	A	G	-0.0695	0.008417	1.493e-16
	rs62363935	T	G	0.2019	0.034144	3.355e-09
	rs62363942	T	C	-0.0987	0.015865	4.927e-10
	rs71624119	A	G	-0.0659	0.009234	9.559e-13
	rs75187300	T	G	0.1997	0.019394	7.262e-25
	rs7728232	A	G	0.0875	0.008689	7.495e-24
	rs7730934	A	G	0.3693	0.012608	1.376e-188
	rs77847765	A	G	0.1236	0.010993	2.488e-29
	rs78770369	A	G	0.2243	0.027875	8.506e-16

## Sheet: Table S7
Table S7. Association of main IL-6 signaling instrument with risk of chronic pain, weighted on CRP levels
Chronic pain subtypes	Methods	SNP	Beta	SE	OR (95%CI)	P value
Headaches for 3+ months	MR Egger	26	0.0168306	0.0318598	1.017(0.955,1.083)	0.602162
Headaches for 3+ months	Weighted median	26	-0.033357	0.0200644	0.967(0.93,1.006)	0.0964123
Headaches for 3+ months	Inverse variance weighted	26	-0.0289687	0.0182668	0.971(0.937,1.007)	0.112769
Headaches for 3+ months	Simple mode	26	-0.03365	0.031637	0.967(0.909,1.029)	0.297665
Headaches for 3+ months	Weighted mode	26	-0.0312884	0.0215293	0.969(0.929,1.011)	0.158582
Headaches for 3+ months	MR -PRESSO	26	-0.0289687	0.0182668	0.971(0.937,1.007)	0.125338
Hip pain for 3+ months	MR Egger	26	-0.0305849	0.0276881	0.97(0.919,1.024)	0.280274
Hip pain for 3+ months	Weighted median	26	-0.0264145	0.0225358	0.974(0.932,1.018)	0.24115
Hip pain for 3+ months	Inverse variance weighted	26	-0.0190014	0.0152818	0.981(0.952,1.011)	0.213718
Hip pain for 3+ months	Simple mode	26	0.0020841	0.0329304	1.002(0.939,1.069)	0.95004
Hip pain for 3+ months	Weighted mode	26	-0.0126213	0.022991	0.987(0.944,1.033)	0.587897
Hip pain for 3+ months	MR -PRESSO	26	-0.0190014	0.0139288	0.981(0.955,1.008)	0.184666
Neck/shoulder pain for 3+ months	MR Egger	26	0.0120433	0.0215692	1.012(0.97,1.056)	0.581774
Neck/shoulder pain for 3+ months	Weighted median	26	-0.00283271	0.0169034	0.997(0.965,1.031)	0.866912
Neck/shoulder pain for 3+ months	Inverse variance weighted	26	-0.000310614	0.0118976	1(0.977,1.023)	0.979172
Neck/shoulder pain for 3+ months	Simple mode	26	0.00299861	0.0265415	1.003(0.952,1.057)	0.91095
Neck/shoulder pain for 3+ months	Weighted mode	26	-0.00109577	0.018333	0.999(0.964,1.035)	0.952814
Neck/shoulder pain for 3+ months	MR-PRESSO	26	-0.000310614	0.0107802	1(0.979,1.021)	0.977242
Stomach/abdominal pain for 3+months	MR Egger	24	-0.0174754	0.0450915	0.983(0.9,1.073)	0.702071
Stomach/abdominal pain for 3+months	Weighted median	24	-0.0141385	0.0296174	0.986(0.93,1.045)	0.633097
Stomach/abdominal pain for 3+months	Inverse variance weighted	24	0.0113726	0.0245581	1.011(0.964,1.061)	0.643299
Stomach/abdominal pain for 3+months	Simple mode	24	-0.000810552	0.0413972	0.999(0.921,1.084)	0.984547
Stomach/abdominal pain for 3+months	Weighted mode	24	-0.00909979	0.033286	0.991(0.928,1.058)	0.787
Stomach/abdominal pain for 3+months	MR-PRESSO	24	0.0113726	0.0245581	1.011(0.964,1.061)	0.647651
Back pain for 3+ months	MR Egger	26	-0.0402794	0.0205428	0.961(0.923,1)	0.0616131
Back pain for 3+ months	Weighted median	26	-0.0397147	0.0163575	0.961(0.931,0.992)	0.0151857
Back pain for 3+ months	Inverse variance weighted	26	-0.0416958	0.0113375	0.959(0.938,0.981)	0.000235344
Back pain for 3+ months	Simple mode	26	-0.0467338	0.0274717	0.954(0.904,1.007)	0.10132
Back pain for 3+ months	Weighted mode	26	-0.0423694	0.0174962	0.959(0.926,0.992)	0.0230376
Back pain for 3+ months	MR-PRESSO	26	-0.0416958	0.00830244	0.959(0.944,0.975)	3.51987e-05
Knee pain for 3+ months	MR Egger	26	-0.035399	0.0199452	0.965(0.928,1.004)	0.0886145
Knee pain for 3+ months	Weighted median	26	-0.0328248	0.0159632	0.968(0.938,0.998)	0.0397563
Knee pain for 3+ months	Inverse variance weighted	26	-0.0365146	0.010996	0.964(0.944,0.985)	0.000897832
Knee pain for 3+ months	Simple mode	26	-0.0256073	0.022118	0.975(0.933,1.018)	0.257903
Knee pain for 3+ months	Weighted mode	26	-0.0256073	0.0158533	0.975(0.945,1.005)	0.118804
Knee pain for 3+ months	MR-PRESSO	26	-0.0365146	0.00888853	0.964(0.947,0.981)	0.000375212
Facial pains for 3+ months	MR Egger	25	-0.0959372	0.0943158	0.909(0.755,1.093)	0.319644
Facial pains for 3+ months	Weighted median	25	-0.10229	0.0738876	0.903(0.781,1.043)	0.166238
Facial pains for 3+ months	Inverse variance weighted	25	-0.113791	0.0522225	0.892(0.806,0.989)	0.0293345
Facial pains for 3+ months	Simple mode	25	-0.254758	0.125838	0.775(0.606,0.992)	0.0541849
Facial pains for 3+ months	Weighted mode	25	-0.114638	0.08491	0.892(0.755,1.053)	0.189576
Facial pains for 3+ months	MR-PRESSO	25	-0.113791	0.0460896	0.892(0.815,0.977)	0.0210592

## Sheet: Table S8
Table S8. Heterogeneity and pleiotropy tests of instrument effects (drug targets)
Genetic instrument	Outcome	SNP	P value for Cochran Q test of MR Egger	P value for Cochran Q test of Inverse vaiance weighted method	P value for MR-Egger intercept	P value for MR-PRESSO global test
Main genetic instrument associated with C reactive protein in target IL-6R genes	Headache for 3+ month	26	0.024227	0.00982194	0.0975736	0.018
	Hip pain for 3+ months	26	0.666996	0.705404	0.620456	0.714
	Neck/shoulder pain for 3+ months	26	0.693754	0.718796	0.498872	0.732
	Stomache/abdominal pain for 3+months	24	0.140275	0.151131	0.45194	0.194
	Back pain for 3+ months	26	0.959067	0.971117	0.934789	0.978
	Knee pain for 3+ months	26	0.875758	0.90447	0.947104	0.914
	Facial pain for 3+ months	25	0.721779	0.768106	0.822181	0.78
Alternative genetic instrument associated with sIL-6R in target IL-6R genes	Headache for 3+ month	34	0.391025	0.43873	0.901901	0.582
	Hip pain for 3+ months	33	0.996523	0.996944	0.50104	1
	Neck/shoulder pain for 3+ months	34	0.213761	0.240134	0.614704	0.232
	Stomache/abdominal pain for 3+months	27	0.242178	0.10887	0.0391956	0.32
	Back pain for 3+ months	34	0.921089	0.92811	0.477498	0.956
	Knee pain for 3+ months	34	0.838236	0.836911	0.346561	0.93
	Facial pain for 3+ months	34	0.558408	0.604997	0.814756	0.508
CisCRP variants	Headache for 3+ month	16	0.84494	0.87042	0.560951	0.7884
	Hip pain for 3+ months	16	0.195412	0.222735	0.526781	0.6076
	Neck/shoulder pain for 3+ months	16	0.639616	0.665406	0.453445	0.762
	Stomache/abdominal pain for 3+months	16	0.678778	0.686465	0.383524	0.48
	Back pain for 3+ months	16	0.711573	0.725602	0.416001	0.8628
	Knee pain for 3+ months	16	0.100975	0.0770975	0.234455	0.974
	Facial pain for 3+ months	15	0.76294	0.729	0.27247	0.7096
cisGP130 variants	Headache for 3+ month	22	0.00530665	0.00485216	0.364437	0.014
	Hip pain for 3+ months	22	0.964444	0.976068	0.916214	0.978
	Neck/shoulder pain for 3+ months	20	0.349944	0.236679	0.0920139	0.206
	Stomache/abdominal pain for 3+months	22	0.33249	0.364456	0.508901	0.4
	Back pain for 3+ months	22	0.482667	0.353215	0.0878815	0.396
	Knee pain for 3+ months	22	0.748868	0.765156	0.444316	0.738
	Facial pain for 3+ months	24	0.360419	0.417128	0.923139	0.43

## Sheet: Table S9
Table S9. Association between genetic mimicry of IL-6 signaling downregulation using main instruments and chronic back pain in the leave-one-out analysis
SNP removed	Beta	SE	Pvalue
rs112203594	-0.0412531	0.0114106	0.000299984
rs11264224	-0.0406039	0.0115774	0.000452918
rs113580743	-0.0433626	0.011488	0.000160263
rs116141616	-0.0423795	0.0114206	0.000206598
rs12059682	-0.0444039	0.0116033	0.000129795
rs12083537	-0.0425118	0.0119465	0.000372967
rs12406117	-0.0405425	0.0113741	0.000364594
rs12735458	-0.0390183	0.011504	0.00069455
rs144029367	-0.0412172	0.0114216	0.000307729
rs145262901	-0.0422933	0.0113939	0.000205689
rs145909430	-0.0434531	0.0116559	0.000193011
rs16836054	-0.0399252	0.0115649	0.000555899
rs183641528	-0.0408348	0.0114994	0.000383721
rs2228145	-0.0414214	0.0133191	0.00187139
rs34693607	-0.0422449	0.0115224	0.000246072
rs3738028	-0.0419617	0.0113634	0.000221872
rs3766925	-0.0410924	0.0113496	0.000293916
rs41269913	-0.0419759	0.0115202	0.000268762
rs56100876	-0.0378299	0.0118273	0.00138132
rs61806853	-0.0432418	0.0114159	0.000151957
rs6698385	-0.0419031	0.0113966	0.000236174
rs73026617	-0.0411314	0.0115055	0.000350302
rs7525477	-0.0439541	0.0116085	0.000152854
rs76289529	-0.0408979	0.0114839	0.000369011
rs77994623	-0.0419667	0.011463	0.000251183
rs78035035	-0.0425336	0.0113806	0.00018595
All	-0.0416958	0.0113375	0.000235344

## Sheet: Table S10
Table S10. Association between genetic mimicry of IL-6 signaling downregulation using main instruments and chronic knee pain in the leave-one-out analysis
SNP removed	Beta	SE	Pvalue
rs112203594	-0.0353035	0.0110682	0.00142456
rs11264224	-0.0366907	0.0112286	0.0010846
rs113580743	-0.0380879	0.0111408	0.000629036
rs116141616	-0.0349368	0.0110772	0.00161087
rs12059682	-0.03684	0.0112538	0.00106206
rs12083537	-0.0398703	0.0115872	0.000579829
rs12406117	-0.0365279	0.0110317	0.000929013
rs12735458	-0.0329562	0.0111564	0.0031366
rs144029367	-0.0350011	0.0110761	0.00157735
rs145262901	-0.0359356	0.0110503	0.00114593
rs145909430	-0.0384382	0.011309	0.000676581
rs16836054	-0.0368703	0.0112156	0.00101112
rs183641528	-0.0380948	0.0111547	0.000637524
rs2228145	-0.0376442	0.0129267	0.00358967
rs34693607	-0.0367384	0.0111761	0.0010118
rs3738028	-0.0370724	0.0110209	0.000768705
rs3766925	-0.0358758	0.0110077	0.00111744
rs41269913	-0.0364837	0.0111734	0.00109377
rs56100876	-0.0358002	0.0114593	0.00178338
rs61806853	-0.0354616	0.011071	0.00135961
rs6698385	-0.0363513	0.011053	0.00100614
rs73026617	-0.0372264	0.011159	0.000849921
rs7525477	-0.0387539	0.0112579	0.000576652
rs76289529	-0.0347668	0.0111412	0.00180512
rs77994623	-0.0350215	0.0111182	0.00163311
rs78035035	-0.0373214	0.0110377	0.000721534
All	-0.0365146	0.010996	0.000897832

[truncated: 6 more sheets: Table S11  , Table S12, Table S13, Table S14, Table S15, Table S16]
